# Supplementary material for: Associations between the Quality of the Residential Built Environment and Pregnancy Outcomes among Women in North Carolina
Source: PubMed Central journal article supplement (PMC3295337; doi:10.1289/ehp.1103578), 2011-12-02
Supplement: ehp.1103578.s001.pdf [file ehp.1103578.s001.pdf]

**Supplemental Material**

**Associations Between the Quality of the Residential Built Environment and Pregnancy Outcomes Among Women in North Carolina**

Marie Lynn Miranda, Lynne C. Messer, and Gretchen L. Kroeger

**Table of Contents**

Table 1. Community Assessment Project Tool: Variable List

**Parcel-level Variables**

| Field                              | Values                                      |
|------------------------------------|---------------------------------------------|
| Property Type                      |                                             |
|                                    | <i>Residential</i>                          |
|                                    | <i>Commercial</i>                           |
|                                    | <i>Community</i>                            |
|                                    | <i>Government</i>                           |
|                                    | <i>Faith</i>                                |
|                                    | <i>Empty Lot</i>                            |
|                                    | <i>Residential-Commercial</i>               |
|                                    | <i>Other Mix Type</i>                       |
|                                    | <i>Parking Lot</i>                          |
| Property Status                    |                                             |
|                                    | <i>Occupied</i>                             |
|                                    | <i>Unoccupied</i>                           |
|                                    | <i>Demolished</i>                           |
| Residential Type                   |                                             |
|                                    | <i>Single Family</i>                        |
|                                    | <i>Apartment Complex, 3-6 units</i>         |
|                                    | <i>Apartment Complex, 6 or more units</i>   |
|                                    | <i>Duplex</i>                               |
|                                    | <i>Care Facility</i>                        |
|                                    | <i>Senior Housing</i>                       |
|                                    | <i>Multi-Address Home</i>                   |
|                                    | <i>Mobile Home</i>                          |
|                                    | <i>Other Mix Type</i>                       |
| Other Residential Type Description |                                             |
| Community Type                     |                                             |
|                                    | <i>Alcohol and Drug Treatment Center</i>    |
|                                    | <i>Cemetery</i>                             |
|                                    | <i>Community Recreation/Cultural Center</i> |
|                                    | <i>Hospital</i>                             |
|                                    | <i>Military Service Club</i>                |
|                                    | <i>Park or Playground</i>                   |
|                                    | <i>Public Health Care/Clinic</i>            |
|                                    | <i>School K-12</i>                          |
|                                    | <i>School, University</i>                   |
|                                    | <i>Other</i>                                |
| Other Community Type Description   |                                             |
| Empty Lot Type                     |                                             |
|                                    | <i>Residential</i>                          |
|                                    | <i>Commercial</i>                           |

| Field                             | Values                                   |
|-----------------------------------|------------------------------------------|
| Commercial Type                   |                                          |
|                                   | <i>Business Office</i>                   |
|                                   | <i>Child Care Center</i>                 |
|                                   | <i>Medical Office</i>                    |
|                                   | <i>Dental Office</i>                     |
|                                   | <i>Industrial Building</i>               |
|                                   | <i>Restaurant, Family</i>                |
|                                   | <i>Restaurant, Drive-up</i>              |
|                                   | <i>Hair Salon/Barber Shop</i>            |
|                                   | <i>Auto Repair Shop</i>                  |
|                                   | <i>Bar/Club</i>                          |
|                                   | <i>Liquor Store</i>                      |
|                                   | <i>Adult Merchandise</i>                 |
|                                   | <i>Grocery Store</i>                     |
|                                   | <i>Gas/Convenience</i>                   |
|                                   | <i>Pawn</i>                              |
|                                   | <i>Gun Shop</i>                          |
|                                   | <i>Private Gym</i>                       |
|                                   | <i>Law Office</i>                        |
|                                   | <i>Bail Bond</i>                         |
|                                   | <i>Utility/Gas/Electric Plant</i>        |
|                                   | <i>Day Laborer Office</i>                |
|                                   | <i>Check-Cashing/Money-Lending</i>       |
|                                   | <i>Tienda</i>                            |
|                                   | <i>Retail</i>                            |
|                                   | <i>Other</i>                             |
|                                   | <i>Vacant</i>                            |
| Other Commercial Type Description |                                          |
| Faith Type                        |                                          |
|                                   | <i>Church</i>                            |
|                                   | <i>Mosque</i>                            |
|                                   | <i>Synagogue</i>                         |
|                                   | <i>Temple</i>                            |
|                                   | <i>Other</i>                             |
| Other Faith Type Description      |                                          |
| Residential-Commercial Type       |                                          |
|                                   | <i>Day Care</i>                          |
|                                   | <i>Hair Salon/Barber Shop</i>            |
|                                   | <i>Other Residential-Commercial Type</i> |
| Other Residential-Commercial Type |                                          |
| Other Mix Type Description        |                                          |

**Parcel-level Variables, Continued**

| Field                          | Values                        |      |     |
|--------------------------------|-------------------------------|------|-----|
| Parking Lot Type               |                               |      |     |
|                                | <i>Residential</i>            |      |     |
|                                | <i>Commercial</i>             |      |     |
|                                | <i>Community</i>              |      |     |
|                                | <i>Government</i>             |      |     |
|                                | <i>Faith</i>                  |      |     |
|                                | <i>Empty Lot</i>              |      |     |
|                                | <i>Residential-Commercial</i> |      |     |
|                                | <i>Other Mixed Type</i>       |      |     |
| Broken Windows                 |                               |      |     |
|                                |                               | 0    | No  |
|                                |                               | 1-10 | Yes |
| Boarded Windows                |                               |      |     |
|                                |                               | 0    | No  |
|                                |                               | 1-10 | Yes |
| Boarded Door                   |                               |      |     |
|                                |                               | 0    | No  |
|                                |                               | 1    | Yes |
| Holes in Walls                 |                               |      |     |
|                                |                               | 0    | No  |
|                                |                               | 1    | Yes |
| Roof Damage                    |                               |      |     |
|                                |                               | 0    | No  |
|                                |                               | 1    | Yes |
| Residential Chimney Damage     |                               |      |     |
|                                |                               | 0    | No  |
|                                |                               | 1    | Yes |
| Foundation Damage              |                               |      |     |
|                                |                               | 0    | No  |
|                                |                               | 1    | Yes |
| Residential Front Entry Type   |                               |      |     |
|                                | <i>Stoop</i>                  |      |     |
|                                | <i>Porch</i>                  |      |     |
| Residential Front Entry Damage |                               |      |     |
|                                |                               | 0    | No  |
|                                |                               | 1    | Yes |
| Door Damage                    |                               |      |     |
|                                |                               | 0    | No  |
|                                |                               | 1    | Yes |
| Peeling Paint                  |                               |      |     |
|                                |                               | 0    | No  |
|                                |                               | 1    | Yes |

| Field                    | Values         |   |     |
|--------------------------|----------------|---|-----|
| Peeling Paint Area       |                |   |     |
|                          | <i>Windows</i> |   |     |
|                          | <i>Siding</i>  |   |     |
|                          | <i>Both</i>    |   |     |
| Fire Damage              |                |   |     |
|                          |                | 0 | No  |
|                          |                | 1 | Yes |
| Other Condition          |                |   |     |
| Condemned                |                |   |     |
|                          |                | 0 | No  |
|                          |                | 1 | Yes |
| Eviction Notice          |                |   |     |
|                          |                | 0 | No  |
|                          |                | 1 | Yes |
| Padlocked                |                |   |     |
|                          |                | 0 | No  |
|                          |                | 1 | Yes |
| Residential Driveway     |                |   |     |
|                          |                | 0 | No  |
|                          |                | 1 | Yes |
| Residential Cars on Lawn |                |   |     |
|                          |                | 0 | No  |
|                          |                | 1 | Yes |
| Residential Garden       |                |   |     |
|                          |                | 0 | No  |
|                          |                | 1 | Yes |
| Residential Greenery     |                |   |     |
|                          |                | 0 | No  |
|                          |                | 1 | Yes |
| Residential No Grass     |                |   |     |
|                          |                | 0 | No  |
|                          |                | 1 | Yes |
| Standing Water           |                |   |     |
|                          |                | 0 | No  |
|                          |                | 1 | Yes |
| Litter                   |                |   |     |
|                          |                | 0 | No  |
|                          |                | 1 | Yes |
| Garbage                  |                |   |     |
|                          |                | 0 | No  |
|                          |                | 1 | Yes |

| Field                | Values             |   |     |
|----------------------|--------------------|---|-----|
| Broken Glass         |                    |   |     |
|                      |                    | 0 | No  |
|                      |                    | 1 | Yes |
| Discarded Furniture  |                    |   |     |
|                      |                    | 0 | No  |
|                      |                    | 1 | Yes |
| Discarded Appliances |                    |   |     |
|                      |                    | 0 | No  |
|                      |                    | 1 | Yes |
| Discarded Tires      |                    |   |     |
|                      |                    | 0 | No  |
|                      |                    | 1 | Yes |
| Inoperable Vehicle   |                    |   |     |
|                      |                    | 0 | No  |
|                      |                    | 1 | Yes |
| High Weeds/Grass     |                    |   |     |
|                      |                    | 0 | No  |
|                      |                    | 1 | Yes |
| Graffiti             |                    |   |     |
|                      |                    | 0 | No  |
|                      |                    | 1 | Yes |
| Other Nuisance       |                    |   |     |
| Fencing              |                    |   |     |
|                      |                    | 0 | No  |
|                      |                    | 1 | Yes |
| Fence Damage         |                    |   |     |
|                      |                    | 0 | No  |
|                      |                    | 1 | Yes |
| Fence Material       |                    |   |     |
|                      | <i>Wood</i>        |   |     |
|                      | <i>Chain-link</i>  |   |     |
|                      | <i>Wire</i>        |   |     |
|                      | <i>Vinyl</i>       |   |     |
|                      | <i>Brick</i>       |   |     |
|                      | <i>Iron</i>        |   |     |
|                      | <i>Combination</i> |   |     |
|                      | <i>Other</i>       |   |     |
| Fence Area           |                    |   |     |
|                      | <i>Entire</i>      |   |     |
|                      | <i>Backyard</i>    |   |     |
|                      | <i>Front yard</i>  |   |     |
|                      | <i>Other</i>       |   |     |

| <b>Parcel-level Variables, Continued</b> |        |     | <b>Nuisances</b>   |        |     | <b>Nuisances, Continued</b> |        |     | <b>Nuisances, Continued</b> |        |     |
|------------------------------------------|--------|-----|--------------------|--------|-----|-----------------------------|--------|-----|-----------------------------|--------|-----|
| Field                                    | Values |     | Field              | Values |     | Field                       | Values |     | Field                       | Values |     |
| Security Bars                            |        |     | Graffiti           |        |     | Discarded Furniture         |        |     | Alcohol Container           |        |     |
|                                          | 0      | No  |                    | 0      | No  |                             | 0      | No  |                             | 0      | No  |
|                                          | 1      | Yes |                    | 1      | Yes |                             | 1      | Yes |                             | 1      | Yes |
| Barbed Wire                              |        |     | Broken Glass       |        |     | Discarded Appliances        |        |     | Food Garbage                |        |     |
|                                          | 0      | No  |                    | 0      | No  |                             | 0      | No  |                             | 0      | No  |
|                                          | 1      | Yes |                    | 1      | Yes |                             | 1      | Yes |                             | 1      | Yes |
| No Trespassing Sign                      |        |     | Shopping Cart      |        |     | Discarded Tires             |        |     | Clothes or Shoes            |        |     |
|                                          | 0      | No  |                    | 0      | No  |                             | 0      | No  |                             | 0      | No  |
|                                          | 1      | Yes |                    | 1      | Yes |                             | 1      | Yes |                             | 1      | Yes |
| For Sale Sign                            |        |     | Litter             |        |     | Large Trash                 |        |     | Baby Diapers                |        |     |
|                                          | 0      | No  |                    | 0      | No  |                             | 0      | No  |                             | 0      | No  |
|                                          | 1      | Yes |                    | 1      | Yes |                             | 1      | Yes |                             | 1      | Yes |
| For Rent Sign                            |        |     | Drug Paraphernalia |        |     | Batteries                   |        |     | Construction Debris         |        |     |
|                                          | 0      | No  |                    | 0      | No  |                             | 0      | No  |                             | 0      | No  |
|                                          | 1      | Yes |                    | 1      | Yes |                             | 1      | Yes |                             | 1      | Yes |
| Residential Other Sign                   |        |     | Inoperable Vehicle |        |     | Condoms                     |        |     | Deep Hole                   |        |     |
| Dog                                      |        |     |                    | 0      | No  |                             | 0      | No  |                             | 0      | No  |
|                                          | 0      | No  |                    | 1      | Yes |                             | 1      | Yes |                             | 1      | Yes |
|                                          | 1      | Yes | High Weeds/Grass   |        |     | Fallen Wires                |        |     | Other                       |        |     |
| Window AC Unit                           |        |     |                    | 0      | No  |                             | 0      | No  | Comments                    |        |     |
|                                          | 0      | No  |                    | 1      | Yes |                             | 1      | Yes | Rater                       |        |     |
|                                          | 1      | Yes | Dog Waste          |        |     | Broken Meter Cover          |        |     |                             |        |     |
| Home Repair                              |        |     |                    | 0      | No  |                             | 0      | No  |                             |        |     |
|                                          | 0      | No  |                    | 1      | Yes |                             | 1      | Yes |                             |        |     |
|                                          | 1      | Yes | Tree Debris        |        |     | Uncovered Storm Drain       |        |     |                             |        |     |
| New Home Construction                    |        |     |                    | 0      | No  |                             | 0      | No  |                             |        |     |
|                                          | 0      | No  |                    | 1      | Yes |                             | 1      | Yes |                             |        |     |
|                                          | 1      | Yes | Standing Water     |        |     | Cigarette Boxes or Butts    |        |     |                             |        |     |
| Comments                                 |        |     |                    | 0      | No  |                             | 0      | No  |                             |        |     |
| Rater                                    |        |     |                    | 1      | Yes |                             | 1      | Yes |                             |        |     |

**Supplemental Material, Table 1**
